# Supplementary material for: Epigenetic Silencing of Peroxisome Proliferator-Activated Receptor γ Is a Biomarker for Colorectal Cancer Progression and Adverse Patients' Outcome
Source: PLOS journal article supplement (doi:10.1371/journal.pone.0014229), 2010-12-03
Supplement: S5 (10.1371/journal.pone.0014229.s005) [file journal.pone.0014229.s005]

| PPAR M 2 | **CGGGGGTATTTTTTTAAATTTC** |  |  |
| --- | --- | --- | --- |
| PPAR met 119 RW | **ACTCTCTACCCCGCGACA** |  |  |
| PPAR FW met 124 | **AAGACGGTTTGGTCGATC** |  |  |
| PPAR RW met 124 | **CGAAAAAAAATCCGAAATTTAA** |  |  |

| **Gene** | **Forward primer 5’-3’** | **Reverse primer 5’-3’** | **Size, bp** | **Position** | **Tm (C°)** |
| --- | --- | --- | --- | --- | --- |
| **PPARG M1** | GTGGGTTTTATTGTGCGC | AACCGAATCGAACCGAAC | 171 | - 123 +49 | 58 |
| **PPARG U1** | GTGGGTTTTATTGTGTGT | AACCAAATCAAACCAAAC | 171 | - 123 +49 | 50 |
| **PPARG M2** | CGGGGGTATTTTTTTAAATTTC | ACTCTCTACCCCGCGACA | 119 | - 270 +151 | 54 |
| **PPARG U2** | GTTGGGGGTATTTTTTTAAATTTT | CCACTCTCTACCCCACAACA | 121 | -272 +151 | 54 |
| **PPARG M3** | AAGACGGTTTGGTCGATC | CGAAAAAAAATCCGAAATTTAA | 124 | - 359 -235 | 52 |
| **PPARG U3** | GGGAAGATGGTTTGGTTGATT | TTCCAAAAAAAAATCCAAAATTTAA | 127 | - 362 -235 | 55 |
| **PPARG M4** | GAGATTAGCGGTTTTTTGAAC | AAACGTAAAACACGAAAAACA | 130 | - 746 -616 | 52 |
| **PPARG U4** | TAGGAGATTAGTGGTTTTTTGAAT | AAAAACATAAAACACAAAAAACAA | 134 | - 749 -615 | 52 |
| **PPARG BS** | AAGGAATTTTGAAAGTGTGTAG | CCAAAAAAAATCCCATTT | 254 | -470 -216 | 55 |
| **PPARG ChIP** | ACATCTTGGGAAGACGGCCTG | CAGGCTACCTGGTGTCGTTTGC | 202 | -368 -166 | 62 |

**Table S1**

**Table S1:** PCR primers used for methylation-specific PCR (MS-PCR), Bisulphite sequencing (BS) and ChIP analysis.
